# Supplementary material
Source: PubMed Central journal article supplement (PMC7550239)
Supplement: NIHMS1634439-supplement-ESI.pdf [file NIHMS1634439-supplement-ESI.pdf]

**Improved Single Cell Proteome Coverage Using Narrow-Bore Packed NanoLC Columns  
and Ultrasensitive Mass Spectrometry**

*Yongzheng Cong,<sup>1#</sup> Yiran Liang,<sup>1#</sup> Khatereh Motamedchaboki,<sup>2</sup> Romain Huguet,<sup>2</sup> Thy Truong,<sup>1</sup>  
Rui Zhao,<sup>3</sup> Yufeng Shen,<sup>4</sup> Daniel Lopez-Ferrer,<sup>2</sup> Ying Zhu<sup>3</sup> and Ryan T. Kelly<sup>1,3\*</sup>*

1. Department of Chemistry and Biochemistry, Brigham Young University, Provo, UT, 84602
2. Thermo Fisher Scientific, San Jose, CA, 95134
3. Environmental Molecular Sciences Laboratory, Pacific Northwest National Laboratory, Richland, WA, 99354
4. CoAnn Technologies, LLC, Richland, WA, 99354

# These author contribute equally to this work

\*Email: ryan.kelly@byu.edu

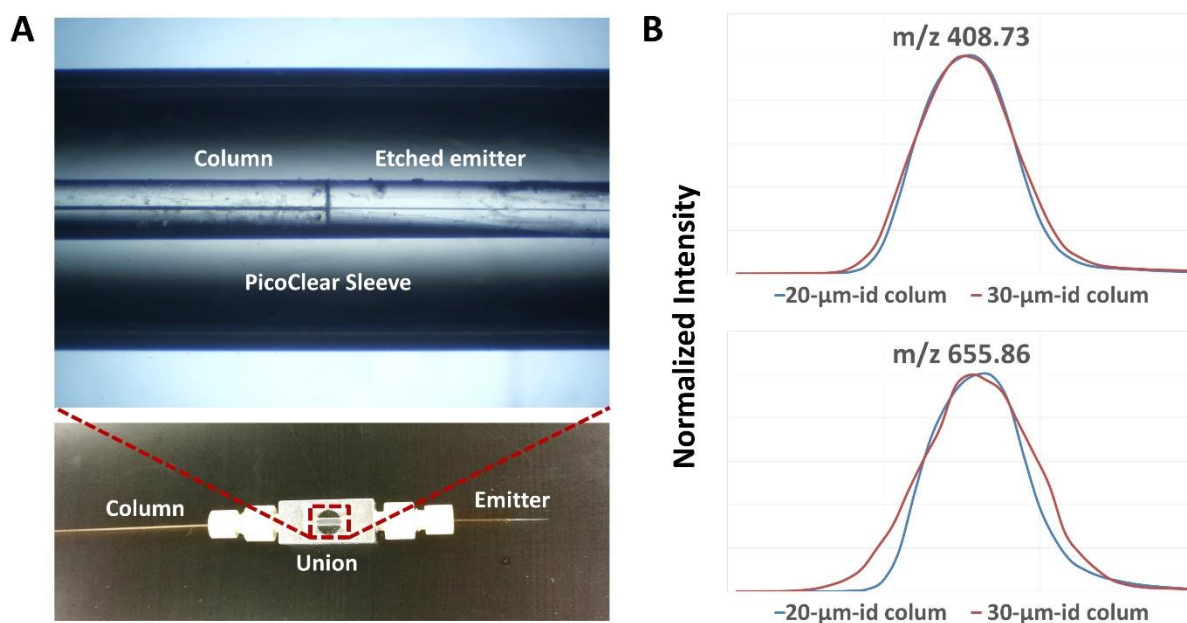

Figure S1. (A) Zero-dead-volume connection between 20- $\mu\text{m}$ -i.d. column and 10- $\mu\text{m}$ -i.d. etched emitter. Polyimide capillary coating was removed to show a clear connection. (B) Similar peak widths achieved using the 20- $\mu\text{m}$ -i.d. column with connected emitter and 30- $\mu\text{m}$ -i.d. column with integrated emitter.

**Table S1.** Number of Unique peptides and protein groups identified from samples using 20  $\mu$ m i.d. column and Eclipse.

|                            | <b>Identification</b> | <b>100<br/>Hela<br/>cells</b> | <b>20<br/>Hela<br/>cells</b> | <b>Single<br/>cell 1</b> | <b>Single<br/>cell 2</b> | <b>Single<br/>cell 3</b> | <b>Single<br/>cell 4<br/>(Large<br/>Hela<br/>cell)</b> | <b>Blank</b> |
|----------------------------|-----------------------|-------------------------------|------------------------------|--------------------------|--------------------------|--------------------------|--------------------------------------------------------|--------------|
| <b>Unique<br/>peptides</b> | By MS/MS              | 9615                          | 7261                         | 1260                     | 1021                     | 1551                     | 3062                                                   | 12           |
|                            | By MS/MS+MBR          | 9839                          | 7908                         | 3657                     | 3661                     | 3059                     | 5865                                                   | 95           |
| <b>Protein<br/>groups</b>  | By MS/MS              | 1646                          | 1386                         | 351                      | 334                      | 402                      | 704                                                    | 6            |
|                            | By MS/MS+MBR          | 1664                          | 1478                         | 910                      | 934                      | 778                      | 1292                                                   | 88           |

Raw data files corresponding to Table S1 are available at the ProteomeXchange Consortium via the PRIDE partner repository with the dataset identifier PXD016921.
